# Supplementary material for: Highly active phosphite gold(i) catalysts for intramolecular hydroalkoxylation, enyne cyclization and furanyne cyclization
Source: Royal Society of Chemistry journal article supplement (doi:10.1039/c4cc00839a), 2014-01-01
Supplement: c4cc00839a1.pdf [file c4cc00839a1.pdf]

## Experimental Section

**General Methods:** Unless otherwise stated, all chemicals were purchased from commercial suppliers and were used without further purification. Dry dichloromethane were used. Chemical shifts were referenced to residual solvent protons. Signal multiplicity as follows: s (singlet), d (doublet), t (triplet), q (quartet), qu (quintet), m (multiplet).

### 1. General procedure for the synthesis of Dimethyl (2*E*)-but-2-en-1-yl(prop-2-yn-1-yl)propanedioate **4**

Propargyl bromide (4.24 g, 80% solution in toluene, 28.5 mmol), 2-allylmalonic acid dimethylester (3.47 g, 18.7 mmol) and Cs<sub>2</sub>CO<sub>3</sub> (12.6 g, 38.7 mmol) were dissolved in acetone (45 mL). The reaction mixture was stirred at room temperature for 20 h. The solvent was removed under reduced pressure and the crude product was purified by flash column chromatography (PE/EA = 20:1) to yield 3.98 g (17.8 mmol, 95%) of the product as colourless oil.

*R*<sub>f</sub> (PE/EA = 20:1) = 0.44; <sup>1</sup>H NMR (250 MHz, CDCl<sub>3</sub>, 25°C): δ = 5.50-5.70 (m, 1H), 5.11-5.30 (m, 1H), 3.76 (s, 6H), 2.78 (d, *J* = 2.6, 2H), 2.73 (d, *J* = 7.5 Hz, 2H), 2.01 (t, *J* = 2.0 Hz, 1H), 1.65 (d, *J* = 6.2 Hz, 3H).

The spectroscopic data corresponds to that reported in the literature.<sup>1</sup>

### 2. General procedure for the synthesis of 4-methyl-*N*-((5-methylfuran-2-yl)methyl)-*N*-(prop-2-yn-1-yl)benzenesulfonamide **7**

To (5-methylfuran-2-yl)methanamine (2.80 g, 25.2 mmol) and triethylamine (2.5 g, 25.2 mmol) in dichloromethane (40 mL) at room temperature TsCl (4.83 g, 25.2 mmol) was added in small portions and then stirred overnight. After the slow addition of water (30 mL), separation of the organic layer, two extractions of the aqueous layer with dichloromethane (2 X 20 mL), the combined organic layers were dried over MgSO<sub>4</sub> and then filtered. After the solvent was removed under vacuum and the residue was recrystallised from diethyl ether, 6.0 g of 4-methyl-*N*-((5-methylfuran-2-yl)methyl)benzenesulfonamide were isolated as white crystals (22.7 mmol, 90%).

The previously obtained tosylamine (4.70 g, 17.7 mmol) was dissolved in acetone (30 mL), K<sub>2</sub>CO<sub>3</sub> (4.88 g, 35.4 mmol) and propargyl bromide (3.42 g, 80% solution in toluene, 21.2 mmol) were added and the mixture was stirred at room temperature for 24 h. Then the solvent

was removed under vacuum, the residue was taken up in water (30 mL) and dichloromethane (20 mL) and the product was extracted with two additional portions of dichloromethane (20 mL). After removal of the solvent, the residue was recrystallised from diethyl ether to afford 5.06 g compound **7** (16.7 mmol, 94%).

$R_f$  (PE/EA = 2:1) = 0.44;  $^1\text{H}$  NMR ( $\text{CDCl}_3$ , 300 MHz,  $25^\circ\text{C}$ ):  $\delta$  = 7.73 (d,  $J$ =8.4 Hz, 2H), 7.28 (d,  $J$ =8.4 Hz, 2H), 6.15 (d,  $J$ =3.1 Hz, 1 H), 5.86 (d,  $J$ =3.1 Hz, 1 H), 4.37 (s, 2H), 4.01 (d,  $J$ =2.5 Hz, 2 H), 2.42 (s, 3 H), 2.19 (s, 3 H), 2.06 (t,  $J$ =2.5 Hz, 1 H).

The spectroscopic data corresponds to that reported in the literature.<sup>2</sup>

### 3. General procedure for the synthesis of 2-(5-Hydroxypent-1-ynyl)benzyl alcohol **9**

In a dry schlenk flask, 2-iodobenzyl alcohol (4.68 g, 20.0 mmol), 4-pentyn-1-ol (2.02 g, 24.0 mmol) and triethylamine (60 mL) were added. The solution was degassed *via* three freeze-pump-thaw cycles. After the addition of  $[\text{Pd}(\text{PPh}_3)_4]$  (0.23 g, 0.200 mmol) and CuI (76.2 mg, 0.400 mmol) the reaction mixture was stirred under nitrogen at room temperature overnight. Finally the reaction mixture was filtrated over celite and the solvent removed in *vacuo* to give the crude product as a thick oil. The crude product was purified by column chromatography (Petrolether:Ethylacetate, 1:1) to afford **9** as white crystals (3.50 g, 18.4 mmol, 92%).

$R_f$ =0.40 (Petrolether/Ethyl acetate 2:1);  $^1\text{H}$  NMR (300 MHz,  $\text{CDCl}_3$ ,  $25^\circ\text{C}$ ):  $\delta$  = 7.39 (t,  $J$  = 7.0 Hz, 2H), 7.26 (m, 2H), 4.78 (s, 2H), 3.83 (t,  $J$  = 6.0 Hz, 2H), 2.59 (t,  $J$  = 6.9 Hz, 2H), 1.92 (br s, 2H), 1.88 (qu,  $J$  = 6.5 Hz, 2H).

The  $^1\text{H}$  NMR corresponds to that reported in the literature.<sup>3</sup>

## 4. General Procedure for the Catalytic Activity

### 4.1 General Procedure for the Preparation of Substrate Stock Solution

In a 5 mL volumetric flask were added 1 mmol) of the corresponding substrate and 12.3 mg (50  $\mu\text{mol}$ ) of 1,3,5-tri-*tert*-butylbenzene as internal standard in deuterated dichloromethane. For each NMR-scale catalytic experiment, 500  $\mu\text{L}$  of this stock solution were used (0.1 mmol).

### 4.2 General Procedure for the Preparation of Gold Catalysts Stock Solutions

Initially, 1.0  $\mu\text{mol}$  of the gold catalyst were diluted in 1 mL  $\text{CD}_2\text{Cl}_2$ , producing the general stock solution 0.001 M. From the latter different dilutions were made. First, taking an aliquot

of 100  $\mu\text{L}$  and making a dilution in 1 mL volumetric flask to produce the 0.0001 M solution, and then, by the same manner, successive dilutions until reaching the desired concentration.

### 4.3 General Procedure for the Preparation of $\text{AgSbF}_6$ Stock Solutions

Initially, 1.717 mg (5.0  $\mu\text{mol}$ ) of  $\text{AgSbF}_6$  were diluted in 5 mL  $\text{CD}_2\text{Cl}_2$ , producing the general stock solution 0.001 M. From the latter different dilutions were made. First, taking an aliquot of 100  $\mu\text{L}$  and making a dilution in 1 mL volumetric flask to produce the 0.0001 M solution, and then, by the same manner, successive dilutions until reaching the desired concentration.

### 4.4 General Procedure for an NMR-Scale Catalytic Procedure.

In a typical experiment, 500  $\mu\text{L}$  of the stock solution previously prepared (substrate 0.1 mmol) and 1,3,5-tri-*tert*-butylbenzene (1.23 mg, 5.0  $\mu\text{mol}$ , 5mol%), were added in a NMR tube. After addition of the corresponding stock solution of the catalyst and the silver salt, the reaction mixture was allowed to stir during the denounced time at the denounced temperature. Conversion of the starting material to product, as well as the yield of the reaction was determined by integration in the  $^1\text{H}$ NMR spectrum of the product relative to the internal standard. Complete conversion was taken to be the time where no remaining substrate was detected.

## 5. Synthesis and Characterization of the Phosphite Catalysts

### 5.1 Catalyst 1

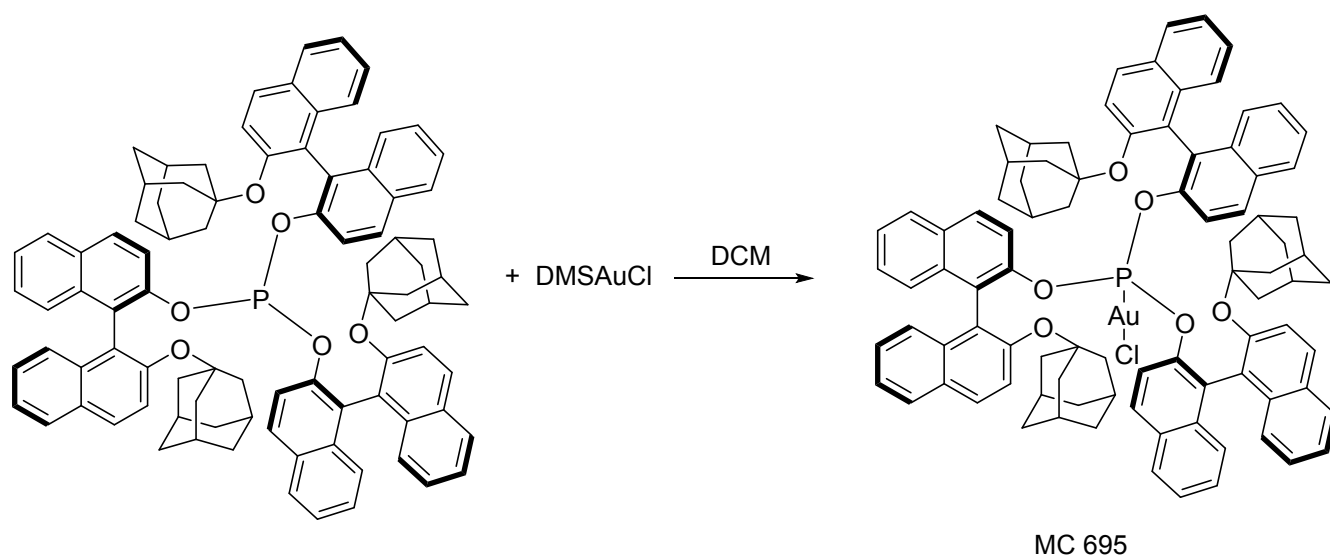

In a flame dried Schlenk flask protected from the light, the phosphite ligand (7.00 mg, 5.43  $\mu\text{mol}$ ) was dissolved in dried dichloromethane (500  $\mu\text{L}$ ) and the  $\text{DMSAuCl}$  (1.60 mg, 5.43  $\mu\text{mol}$ ) was slowly added. The reaction mixture was stirred during 1 h at room temperature. After completion of the

reaction, the volatiles were removed in vacuum and the crude product was purified by flash chromatography (1:1, DCM: PE). After recrystallization from pentane/DCM, the gold complex **MC 695** was obtained as colorless crystals (6.10 mg, 4.01  $\mu\text{mol}$ , 74 %).

$R_f(\text{DCM/PE}=1:1) = 0.28$ ;  $^1\text{H-NMR}$  (400 MHz,  $\text{CDCl}_3$ ,  $25^\circ\text{C}$ ):  $\delta = 7.89$  (dd,  $J = 8.4, 4.2$  Hz, 6H), 7.71 (d,  $J = 8.3$  Hz, 3H), 7.42 (d,  $J = 8.8$  Hz, 3H), 7.39-7.30 (m, 6H), 7.23-7.12 (m, 6H), 7.02 (dd,  $J = 8.4, 4.4$  Hz, 6H), 6.88 (d,  $J = 8.8$  Hz, 3H), 6.19 (d,  $J = 8.8$  Hz, 3H), 1.92 (s, 9H), 1.59 – 1.25 (m, 36H);  $^{13}\text{C}$  NMR (100 MHz,  $\text{CDCl}_3$ ,  $25^\circ\text{C}$ ):  $\delta = 152.2$  (3C), 145.8 (3C), 134.0 (3C), 133.6 (3C), 130.8 (3C), 130.0 (3C), 129.2 (3C), 128.8 (3C), 127.9 (3C), 127.7 (3C), 126.7 (3C), 126.5 (3C), 126.2 (3C), 125.0 (3C), 124.7 (3C), 124.2 (3C), 124.2 (3C), 124.1 (3C), 123.9 (3C), 118.70 (3C), 79.1 (3C), 43.2 (9C), 36.0 (9C), 30.9 (9C);  $^{31}\text{P}$  NMR (162 MHz,  $\text{CDCl}_3$ ,  $25^\circ\text{C}$ ):  $\delta = 107.96$ ; IR (KBr-Pressling): 3357, 3056, 2957, 2925, 2853, 1943, 1792, 1746, 1660, 1621, 1590, 1557, 1540, 1505, 1458  $\text{cm}^{-1}$ ; HRMS (ESI):  $[\text{C}_{90}\text{H}_{81}\text{AuO}_6\text{P}]^+$ : calcd 1485.5431, found 1485.5459.

## 5.2 Catalyst 2

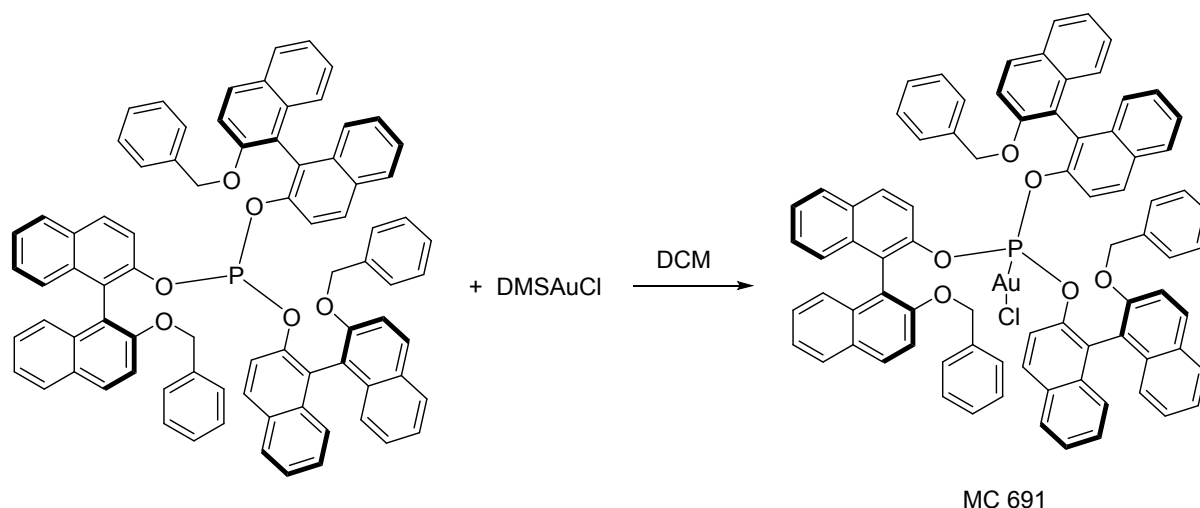

In a flame dried Schlenk flask protected from the light, the phosphite ligand (23.15 mg, 20.0  $\mu\text{mol}$ ) was dissolved in dried dichloromethane (1.00 mL) and the  $\text{DMSAuCl}$  (5.90 mg, 20.0  $\mu\text{mol}$ ) was slowly added. The reaction mixture was stirred during 2 h at room temperature. After completion of the reaction, the volatiles were removed in vacuum and the crude product was purified by flash chromatography (1:1, DCM: PE). After recrystallization from pentane/DCM, the gold complex **MC 691** was obtained as colorless crystals (21.8 mg, 15.69  $\mu\text{mol}$ , 78 %).

$R_f(\text{DCM/PE}=1:1) = 0.10$ ;  $^1\text{H-NMR}$  (500 MHz,  $\text{CD}_2\text{Cl}_2$ ,  $25^\circ\text{C}$ , TMS):  $\delta = 7.92$  (dd,  $J = 8.6, 3.2$  Hz, 6H), 7.80 (d,  $J = 8.2$  Hz, 3H), 7.44 (t,  $J = 7.5$  Hz, 3H), 7.36 (t,  $J = 7.5$  Hz, 3H), 7.27 (d,  $J = 9.1$  Hz, 3H), 7.25 – 7.18 (m, 6H), 7.06 – 7.01 (m, 12H), 7.00 (d,  $J = 9.0$  Hz, 3H), 6.95 (d,  $J = 8.5$  Hz, 3H),

6.83 (dd,  $J = 7.3, 1.8$  Hz, 6H), 6.00 (d,  $J = 9.0$  Hz, 3H), 5.00 (d,  $J = 12.7$  Hz, 3H), 4.87 (d,  $J = 12.7$  Hz, 3H);  $^{13}\text{C}$  NMR (126 MHz,  $\text{CD}_2\text{Cl}_2$ , 25°C, TMS):  $\delta = 154.2$  (3C), 145.4 (3C), 137.1 (3C), 133.7 (3C), 133.5 (3C), 131.1 (3C), 130.3 (3C), 129.4 (3C), 129.2 (3C), 128.1 (6C), 128.0 (3C), 127.9 (3C), 127.5 (3C), 127.4 (3C), 126.8 (6C), 126.7 (3C), 126.0 (3C), 125.5 (3C), 125.1 (3C), 124.1 (3C), 119.1 (3C), 117.7 (3C), 115.2 (3C), 70.5 (3C);  $^{31}\text{P}$  NMR (202 MHz,  $\text{CD}_2\text{Cl}_2$ , 25°C):  $\delta = 108.48$ ; IR (KBr-Pressling): 3433, 2928, 1623, 1507, 1455, 1273, 1208, 1187, 1147  $\text{cm}^{-1}$ ; HRMS (FAB, NBA)  $[\text{C}_{81}\text{H}_{57}\text{AuO}_6\text{PCl}]^+$ : calcd 1388.3247, found 1388.3280.

### 5.3 Catalyst 3

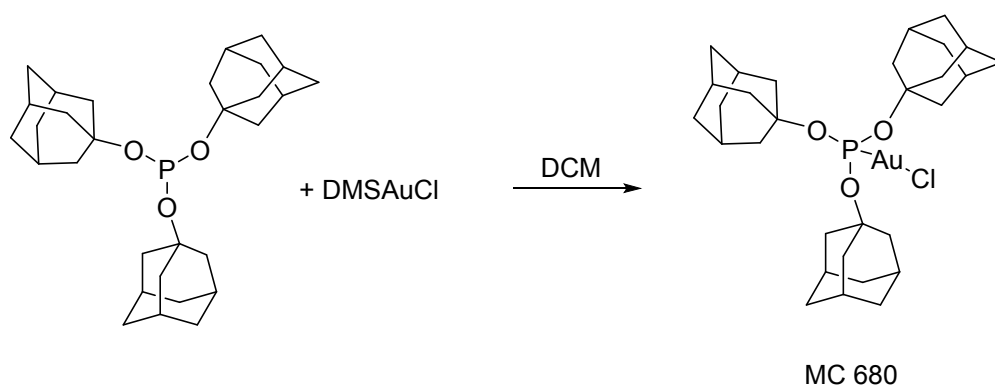

In a flame dried Schlenk flask protected from the light, the phosphite ligand (48.46 mg, 100.0  $\mu\text{mol}$ ) was dissolved in dried dichloromethane (5.00 mL) and the  $\text{DMSAuCl}$  (29.42 mg, 100.0  $\mu\text{mol}$ ) was slowly added. The reaction mixture was stirred during 1 h at room temperature. After completion of the reaction, the volatiles were removed in vacuum and the crude product was purified by flash chromatography (1:1, DCM: PE). After recrystallization from pentane/DCM, the gold complex **MC 680** was obtained as colorless crystals (54.0 mg, 75.31  $\mu\text{mol}$ , 75 %).

$R_f$  (DCM/PE=1:1) = 0.20;  $^1\text{H}$ -NMR (600 MHz,  $\text{C}_6\text{D}_6$ , 25°C, TMS):  $\delta = 2.27$  (s, 18H), 1.91 (s, 9H), 1.43 (d,  $J = 12.4$  Hz, 9H), 1.35 (d,  $J = 12.4$  Hz, 9H);  $^{13}\text{C}$  NMR (151 MHz,  $\text{C}_6\text{D}_6$ , 25°C, TMS):  $\delta = 83.2$  (3C), 45.0 (9C), 35.55 (9C), 31.12 (9C);  $^{31}\text{P}$  NMR (243 MHz,  $\text{C}_6\text{D}_6$ , 25°C):  $\delta = 92.10$ ; IR (KBr-Pressling): 3445, 2912, 2852, 1638, 1455, 1369, 1353, 1316, 1300, 1272, 1186  $\text{cm}^{-1}$ ; HRMS (FAB, NBA):  $[\text{C}_{30}\text{H}_{45}\text{AuO}_3\text{PCl}]^+$ : calcd 716.2461, found 716.2510.

## 6. $^1\text{H}$ and $^{13}\text{C}$ NMR Spectra of Catalysts 1-3

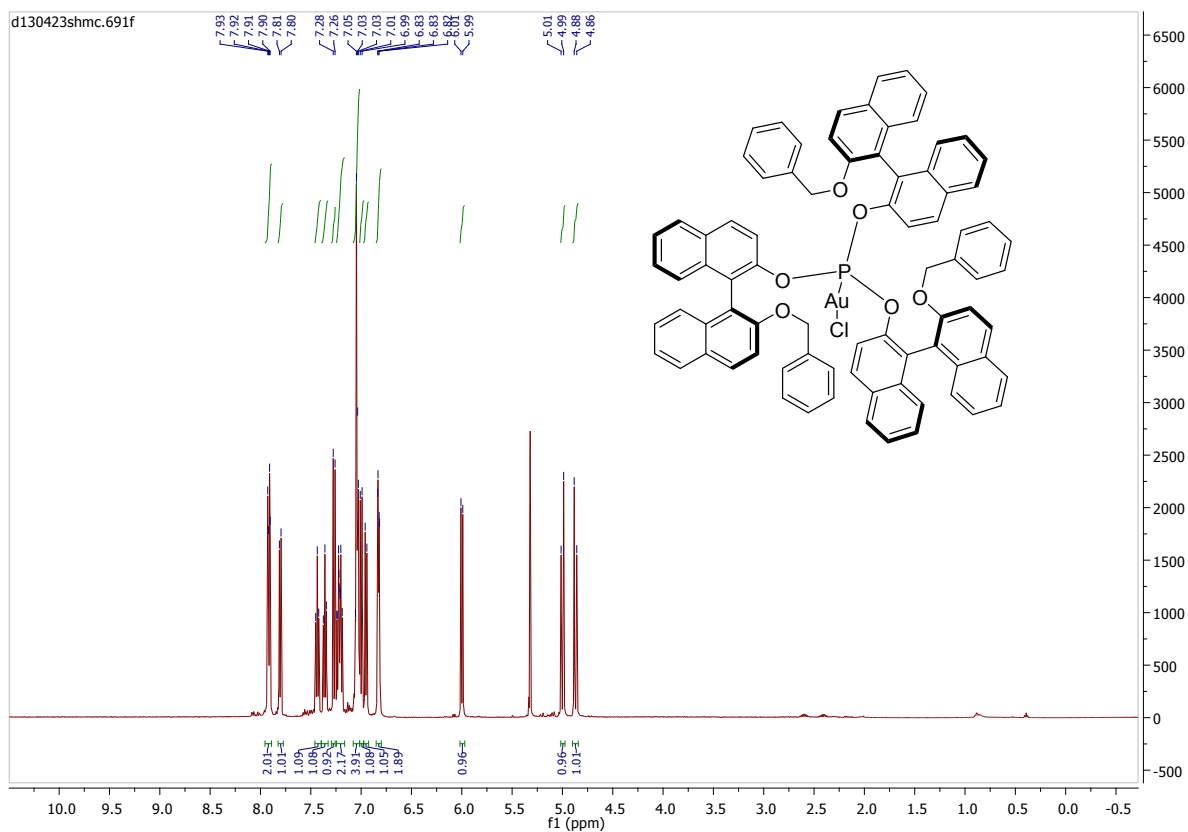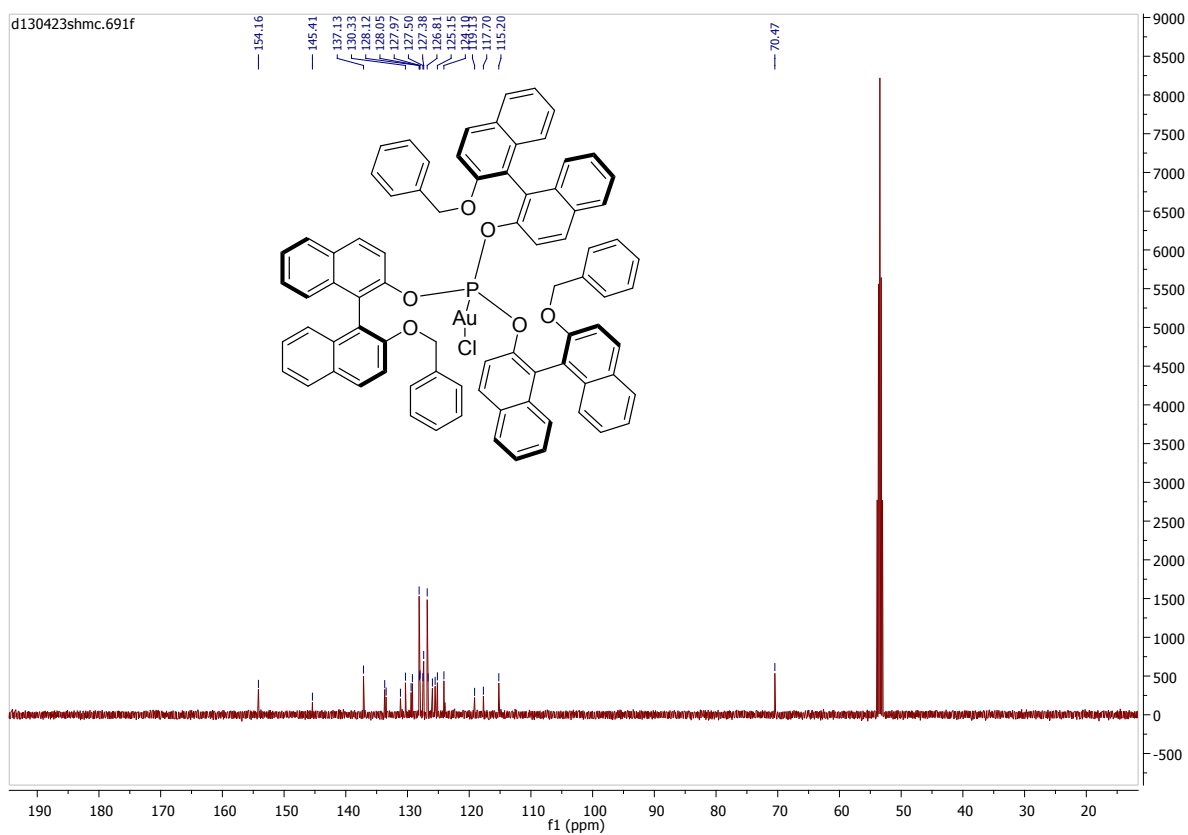

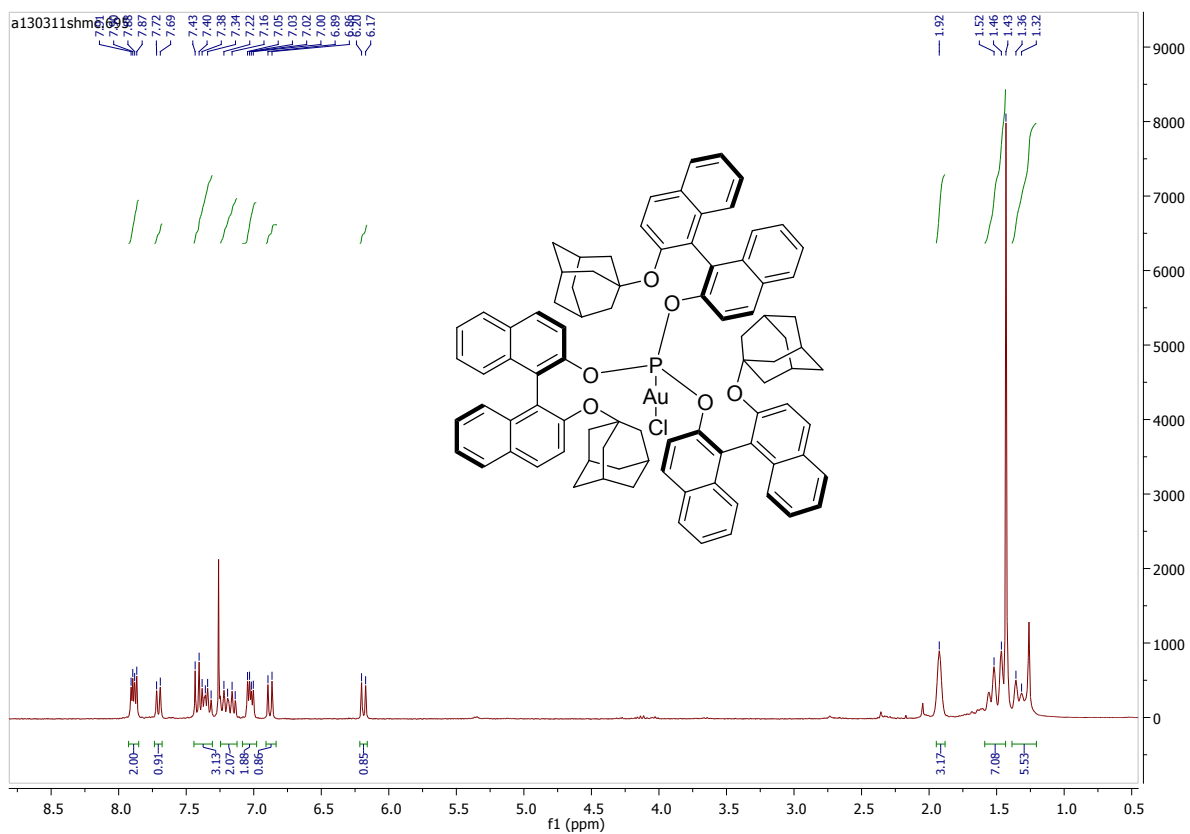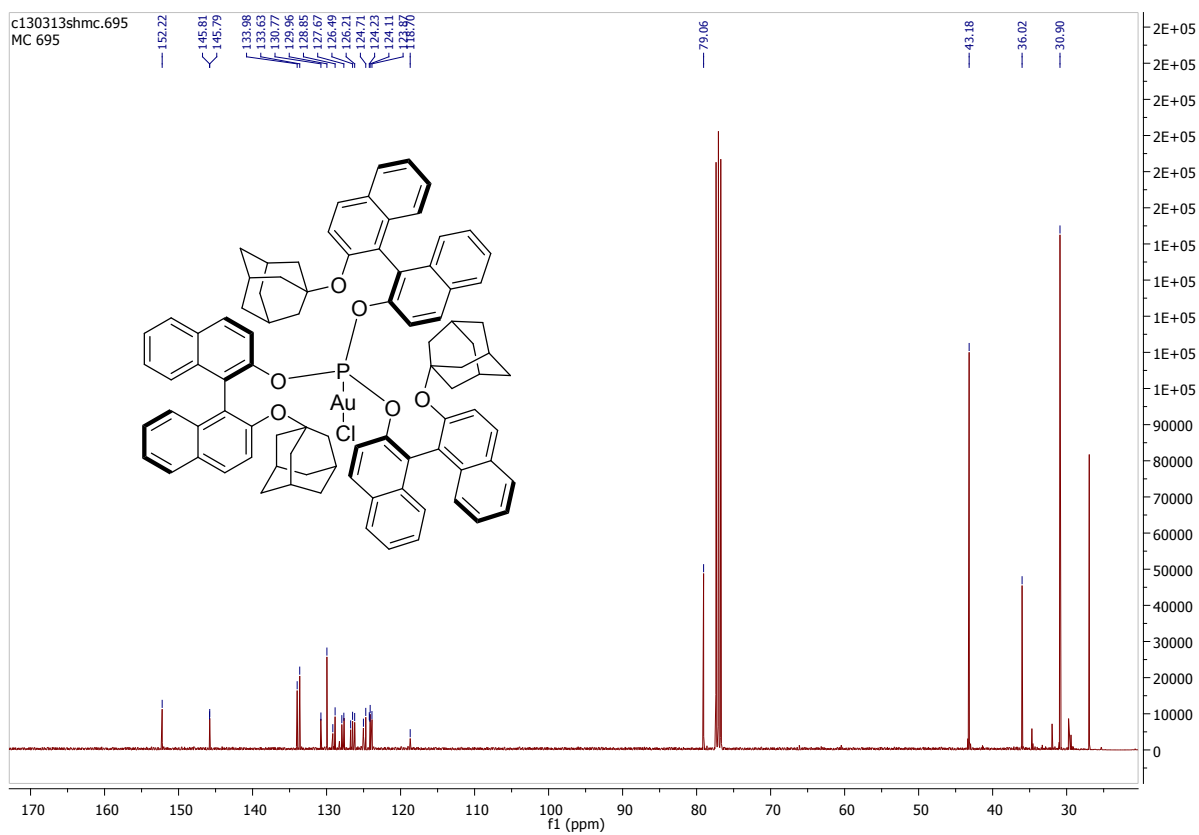

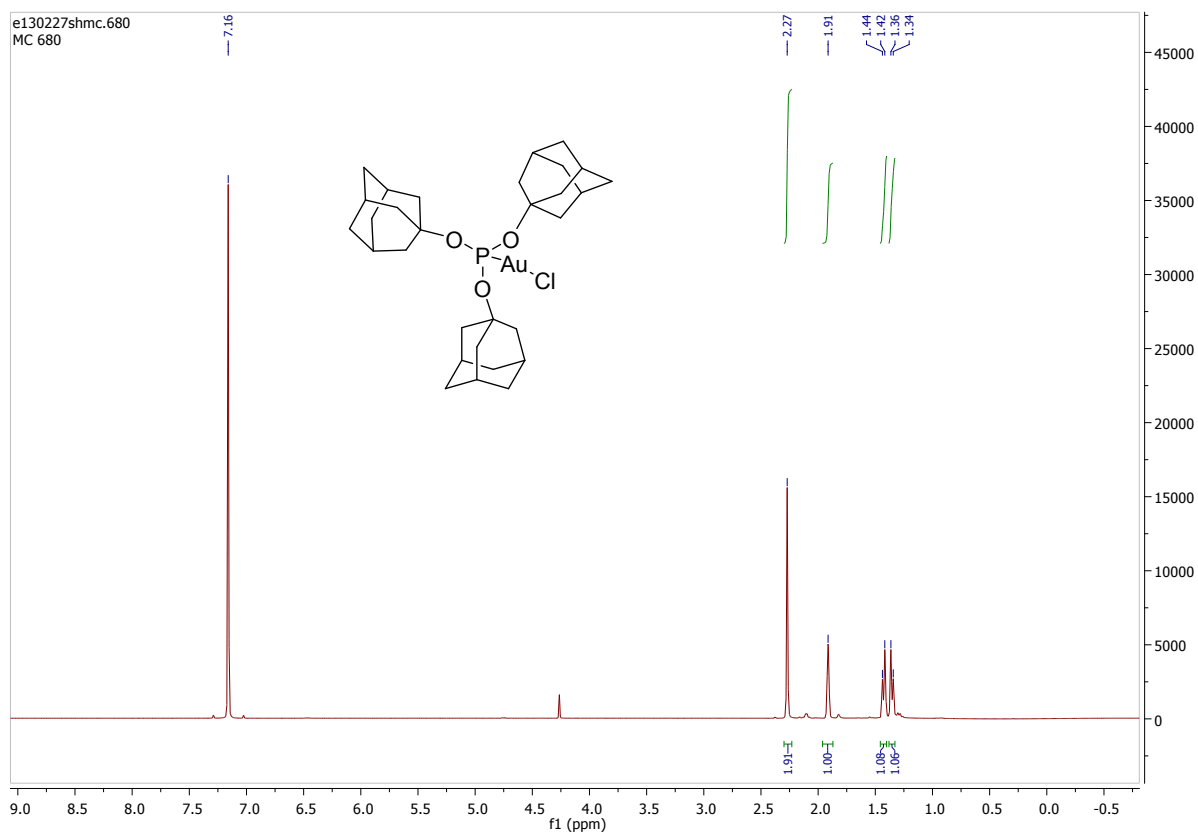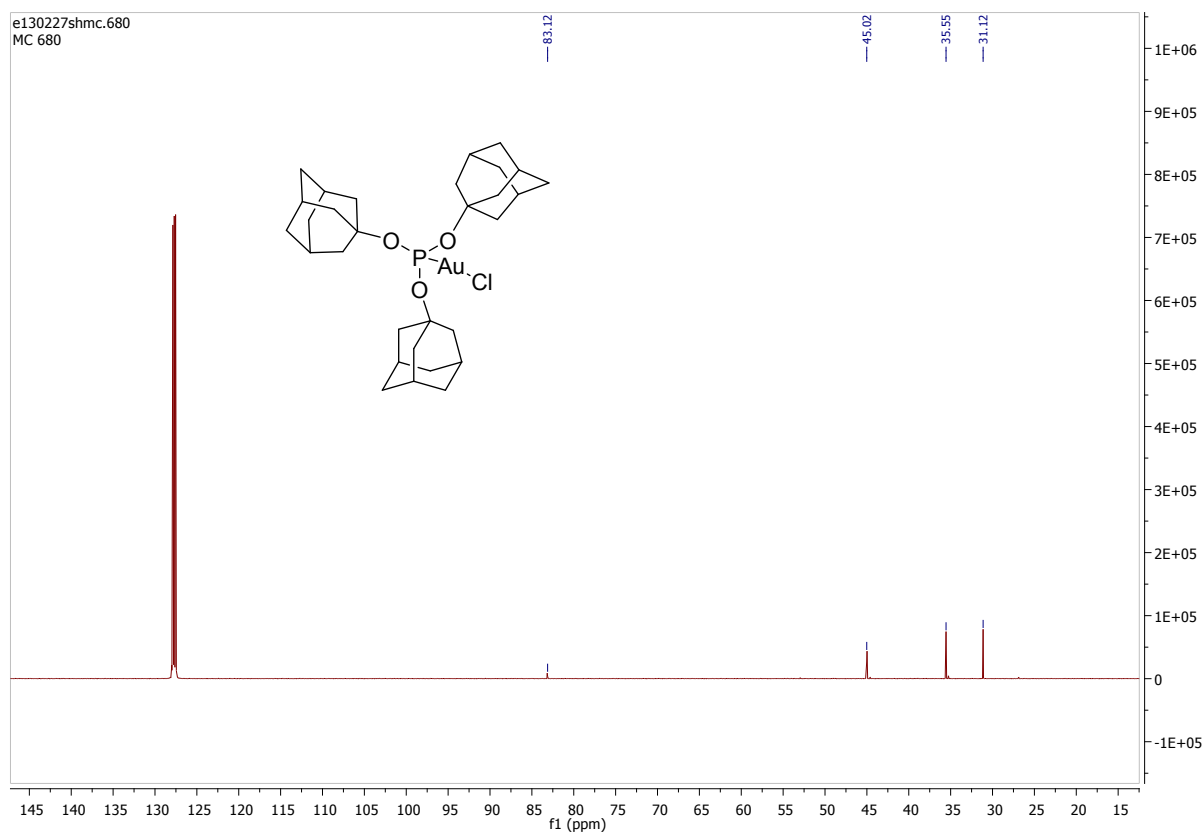



## 7. NMR Spectra Catalytic Conversions for Substrate 7.

### 7.1 Catalyst: 1. Catalyst loading: 0,001 mol%.

Time: 0 h, Conversion 0%

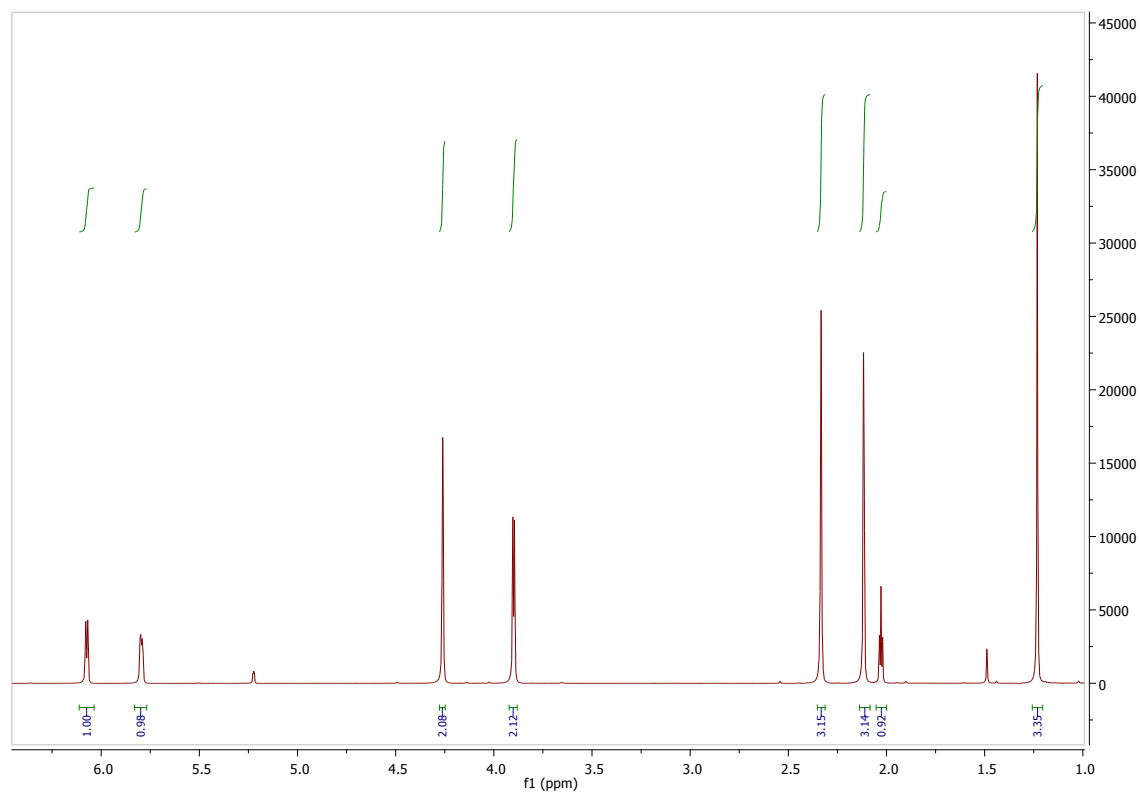

Time: 20 h, Conversion 27%, yield 20%

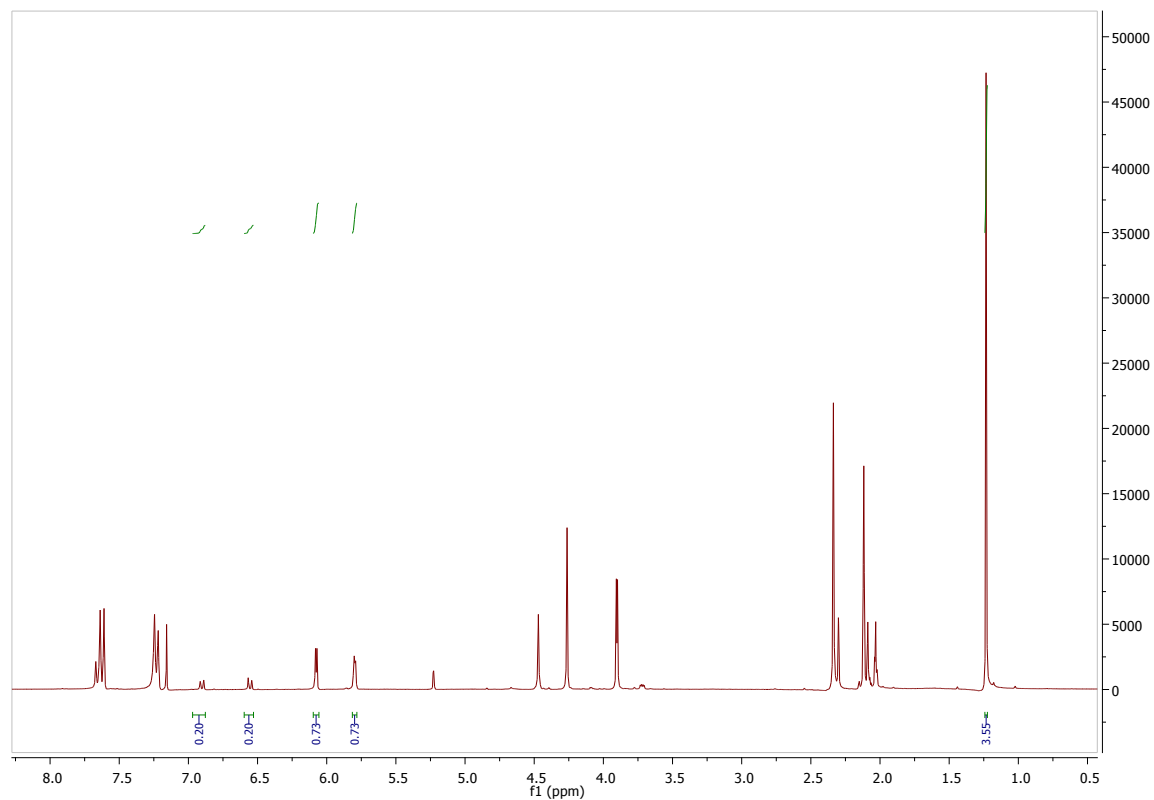

**Time: 40 h, Conversion 40%, yield 31%**

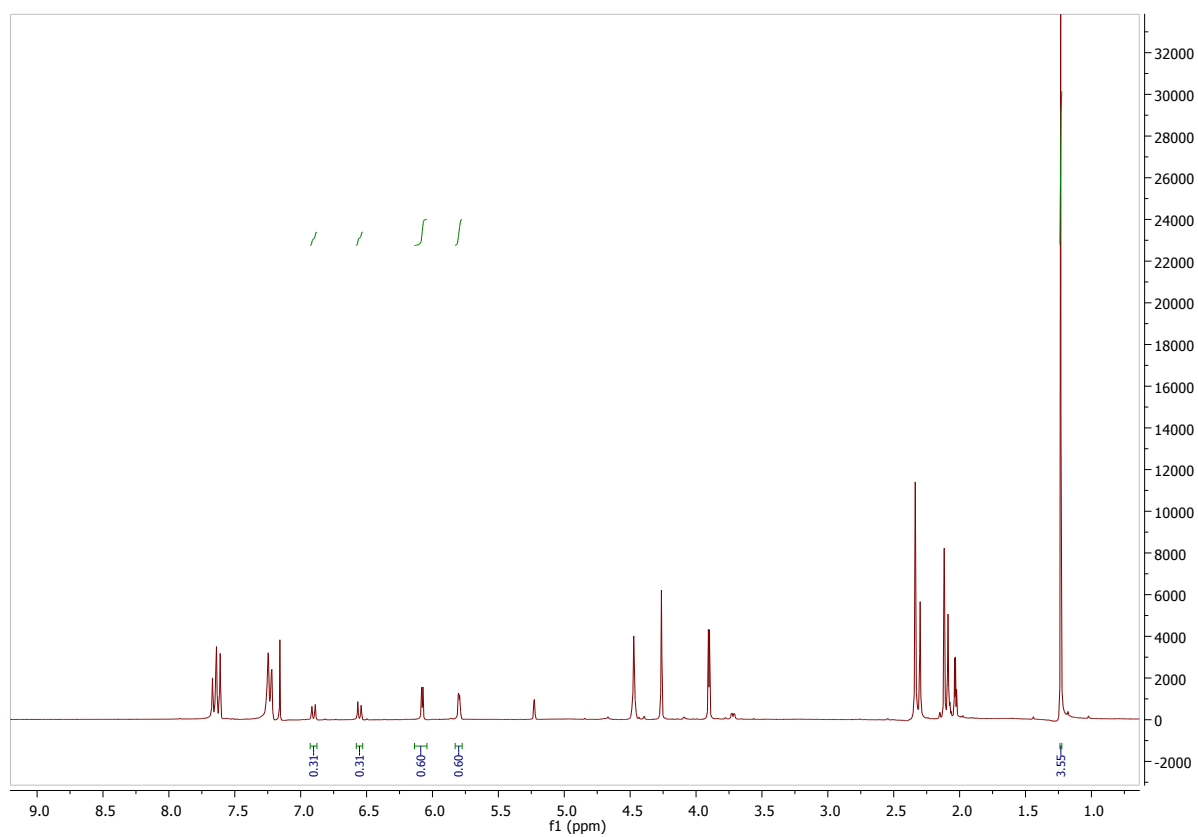

**7.2 Catalyst: 2. Catalyst loading: 0,001 mol%.**

**Time: 0 h, Conversion 0%**

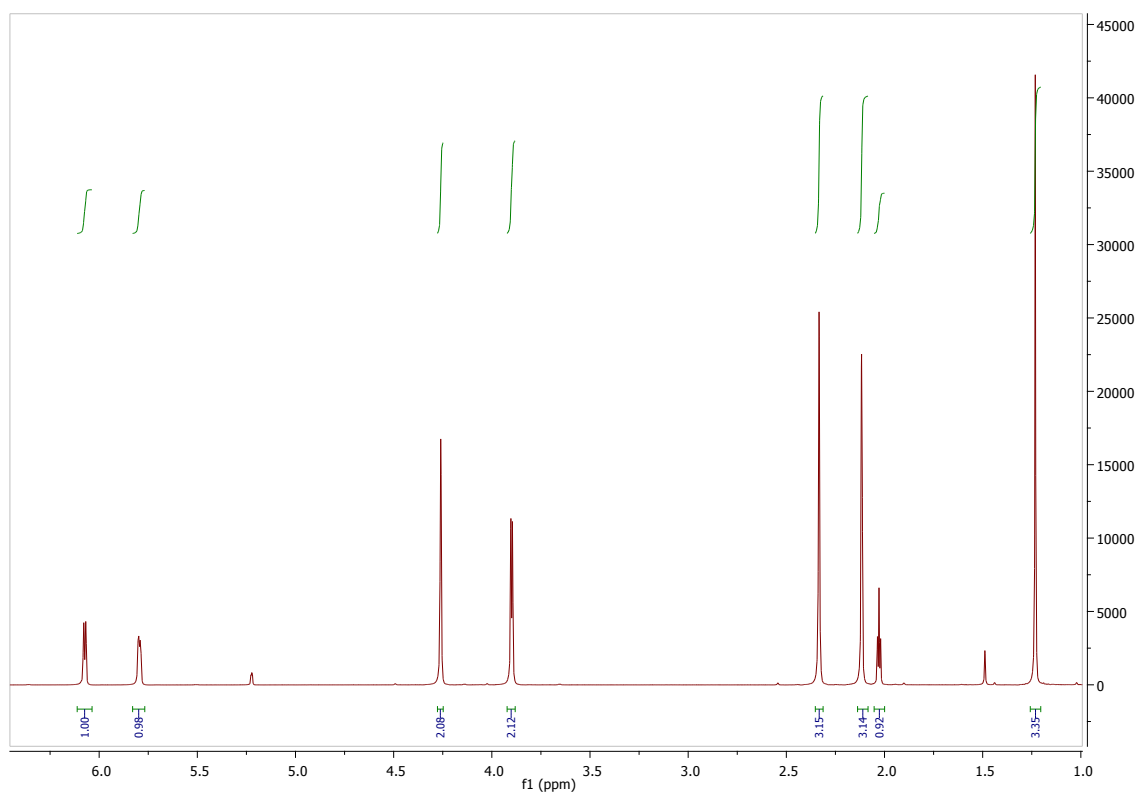

**Time: 20 h, Conversion 33%, yield 27%**

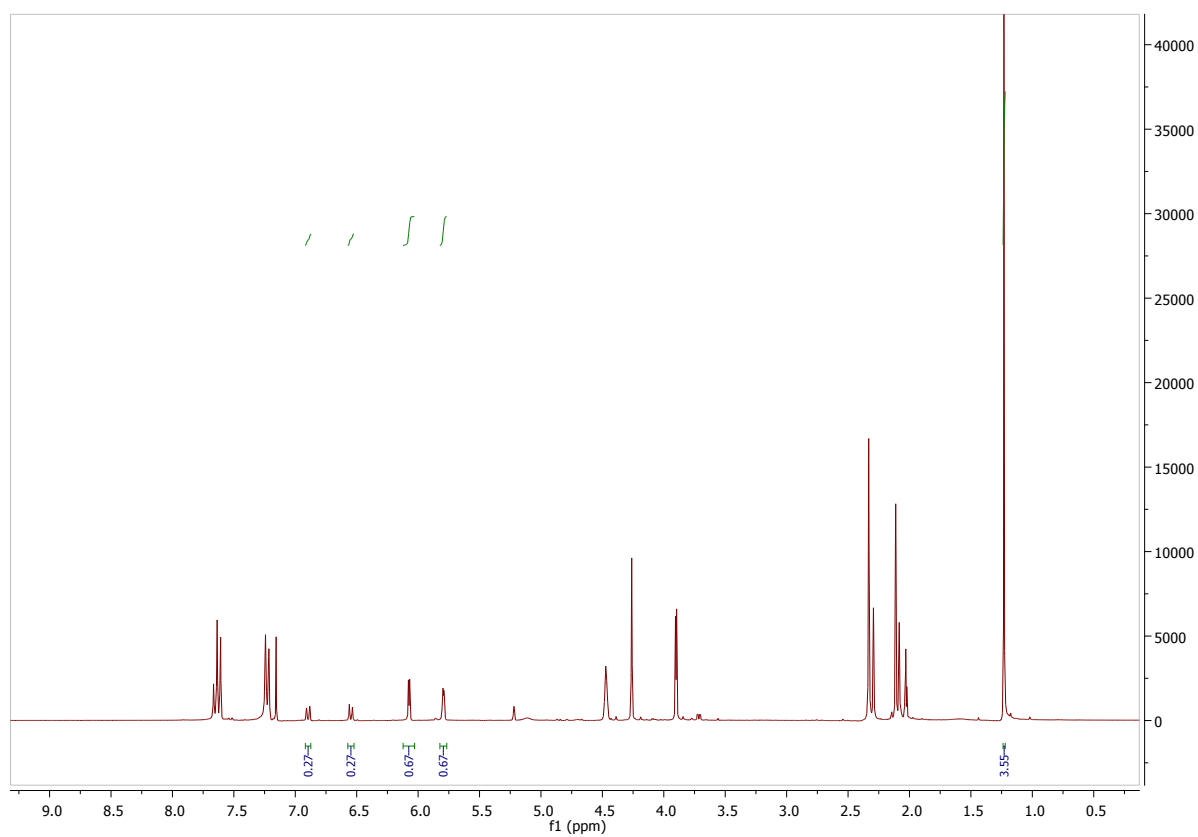

**Time: 40 h, Conversion 50%, yield 37%**

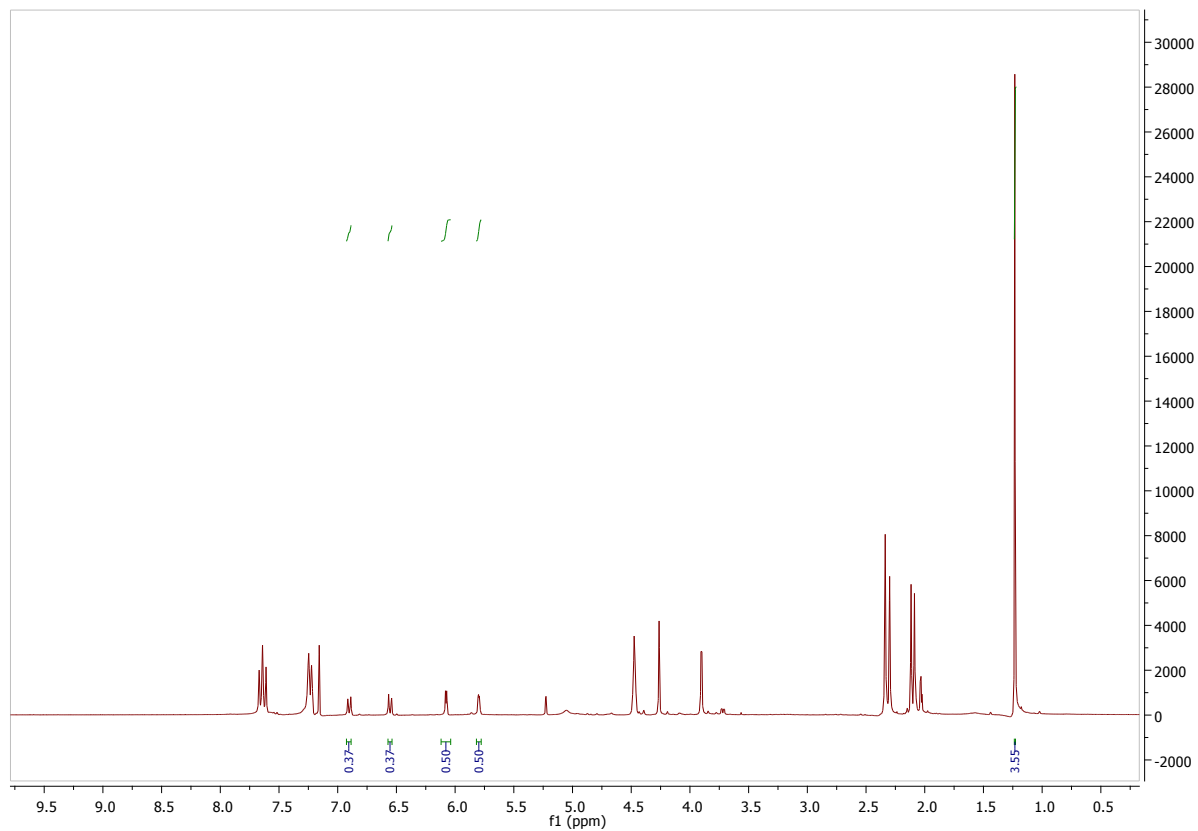

### 7.3 Catalyst: 3. Catalyst loading: 0,001 mol%.

Time: 0 h, Conversion 0%

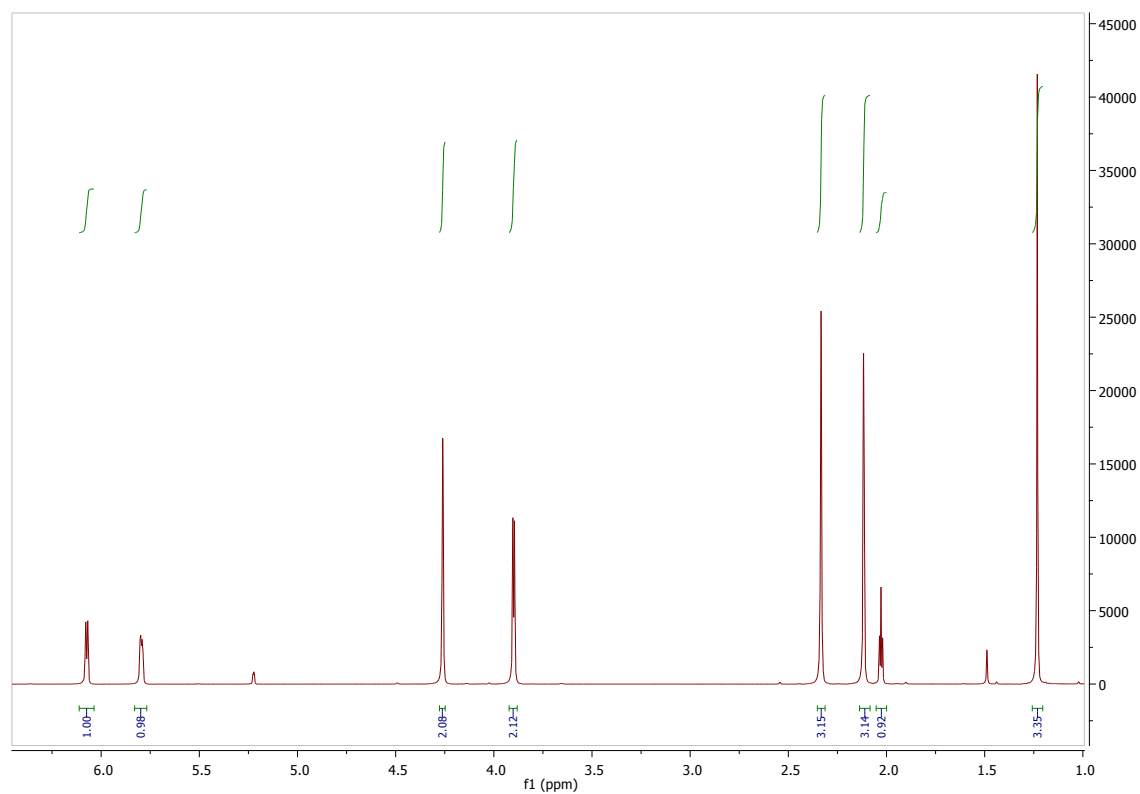

Time: 20 h, Conversion 50%, yield 27%

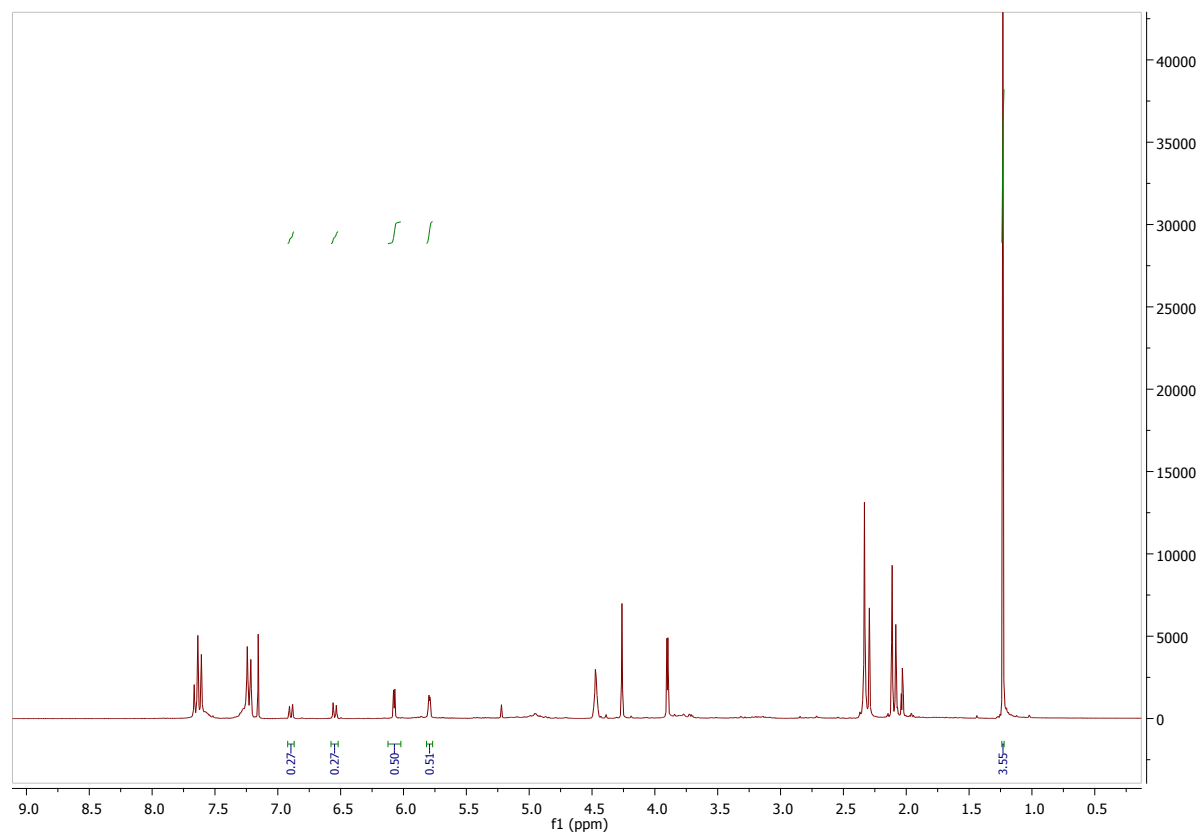

**Time: 40 h, Conversion 65%, yield 35%**

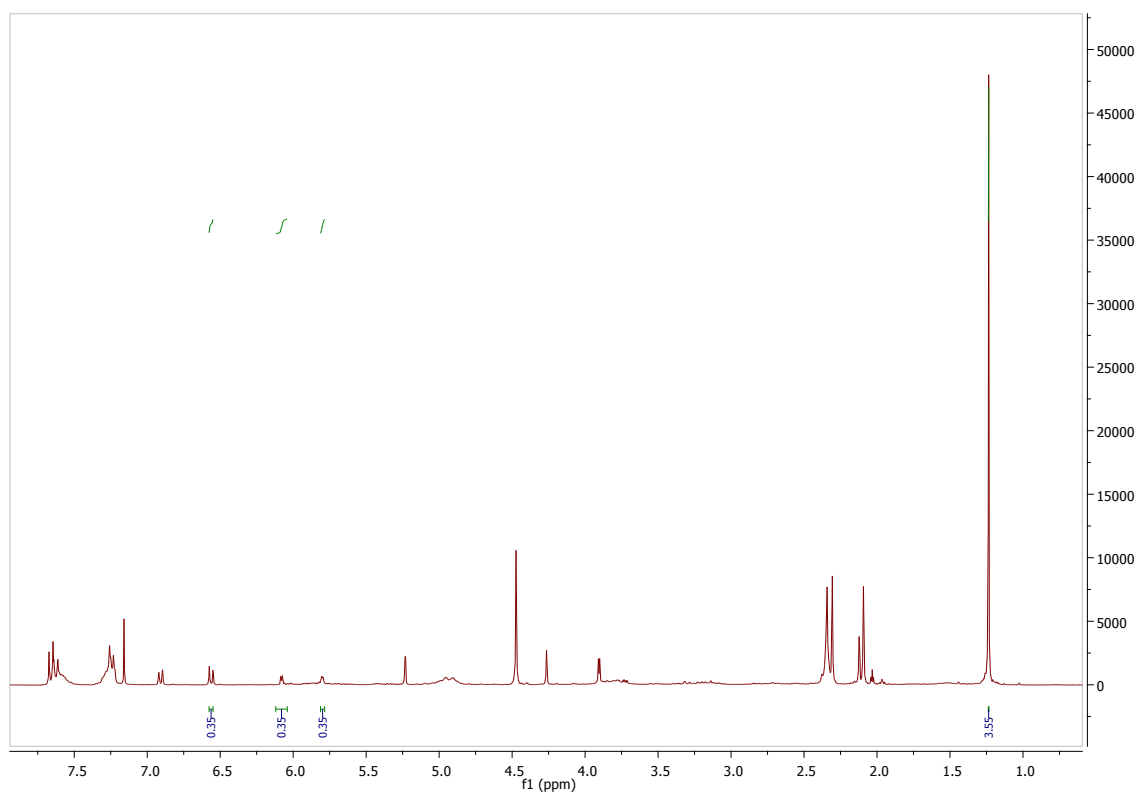

## 8. Catalysts Rate of Conversion of Substrate 9. NMR Spectra Catalytic Conversions

### 8.1 Catalyst: 1. Catalyst loading: 0,0001 mol%.

**Time: 0 h, Conversion 0%**

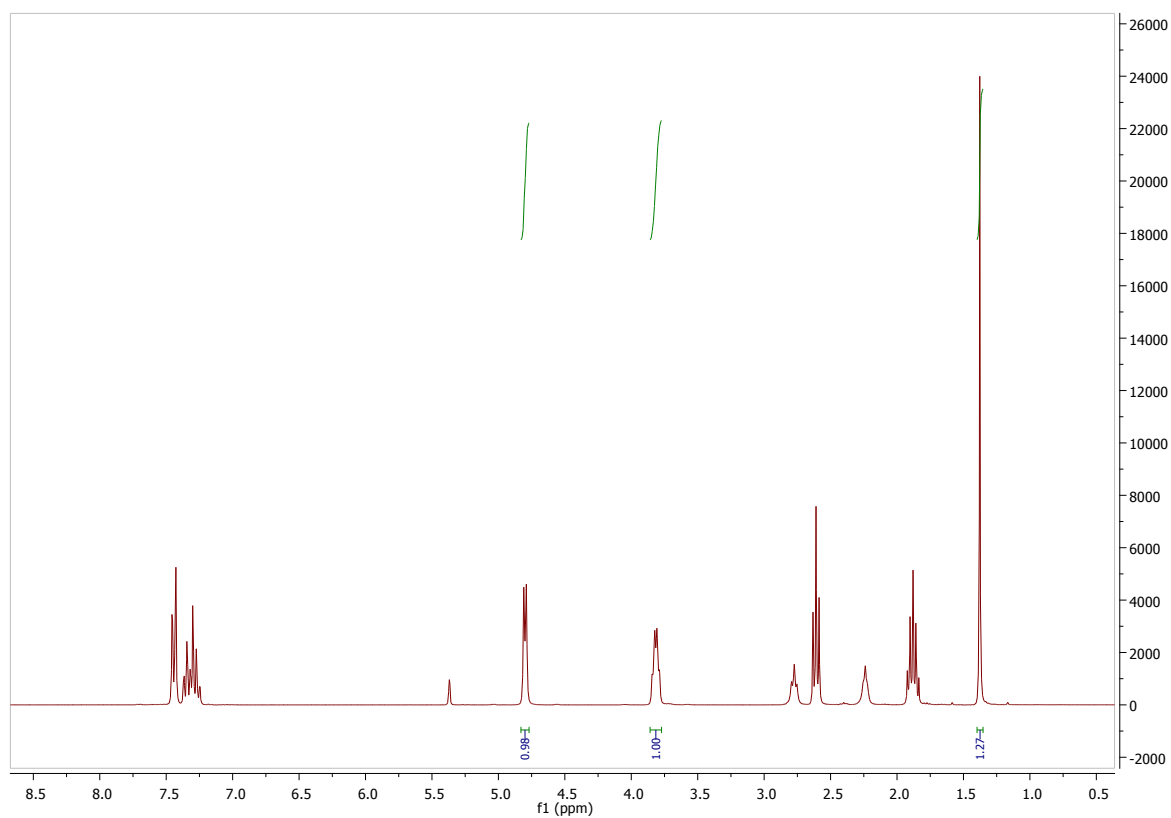

**Time: 6 h, Conversion 6%**

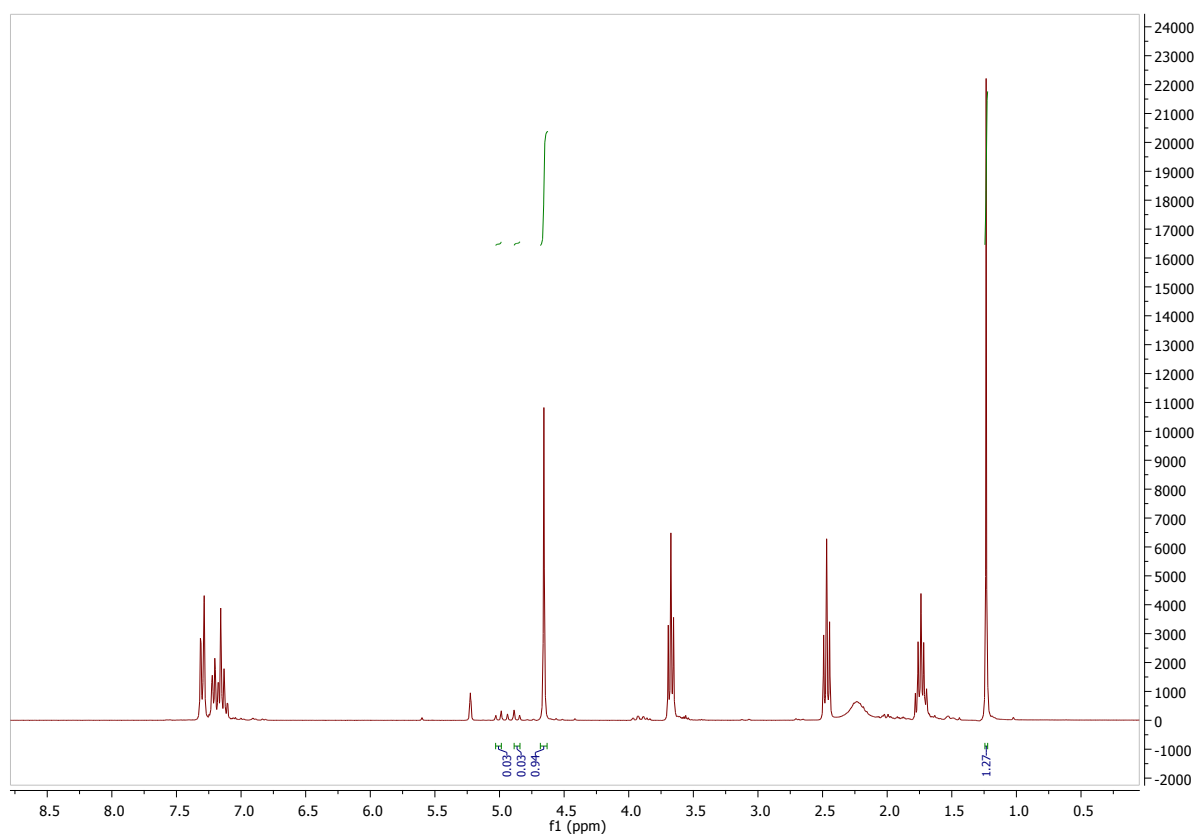

**Time: 20 h, Conversion 34%**

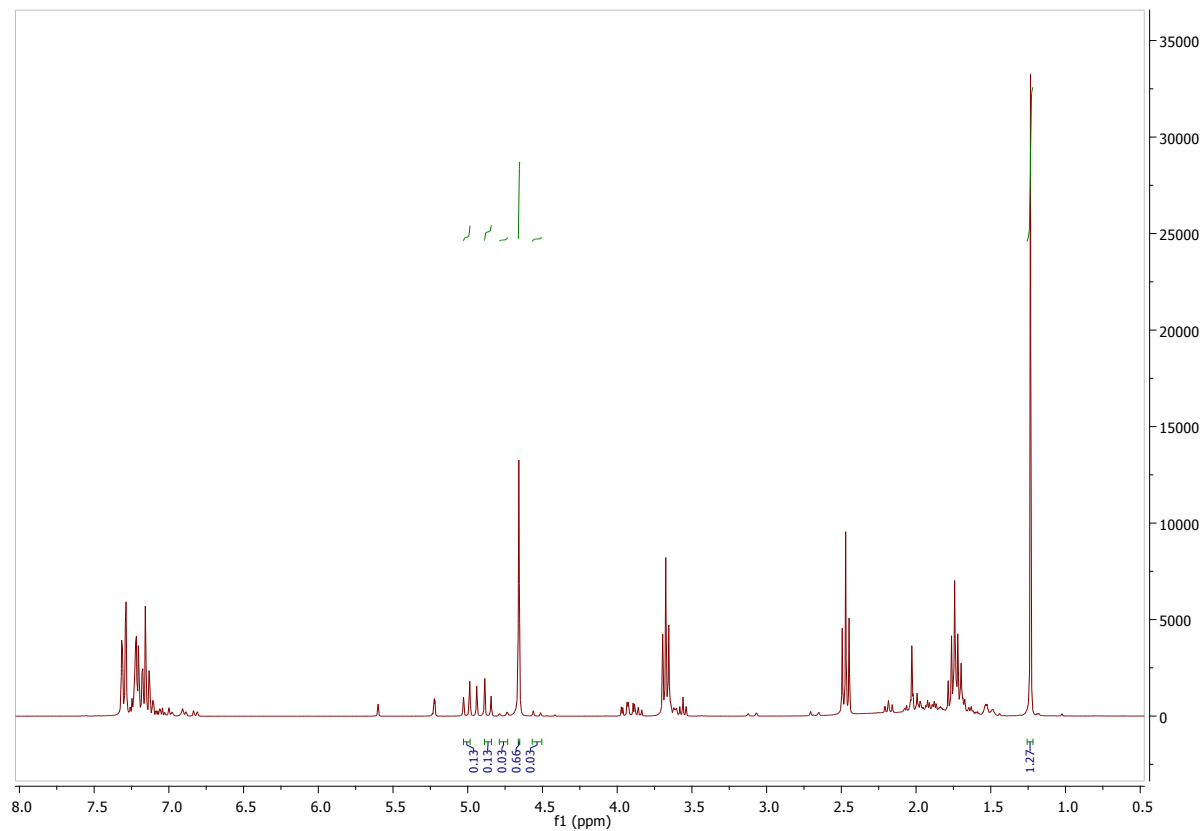

**Time: 40 h, Conversion 100%**

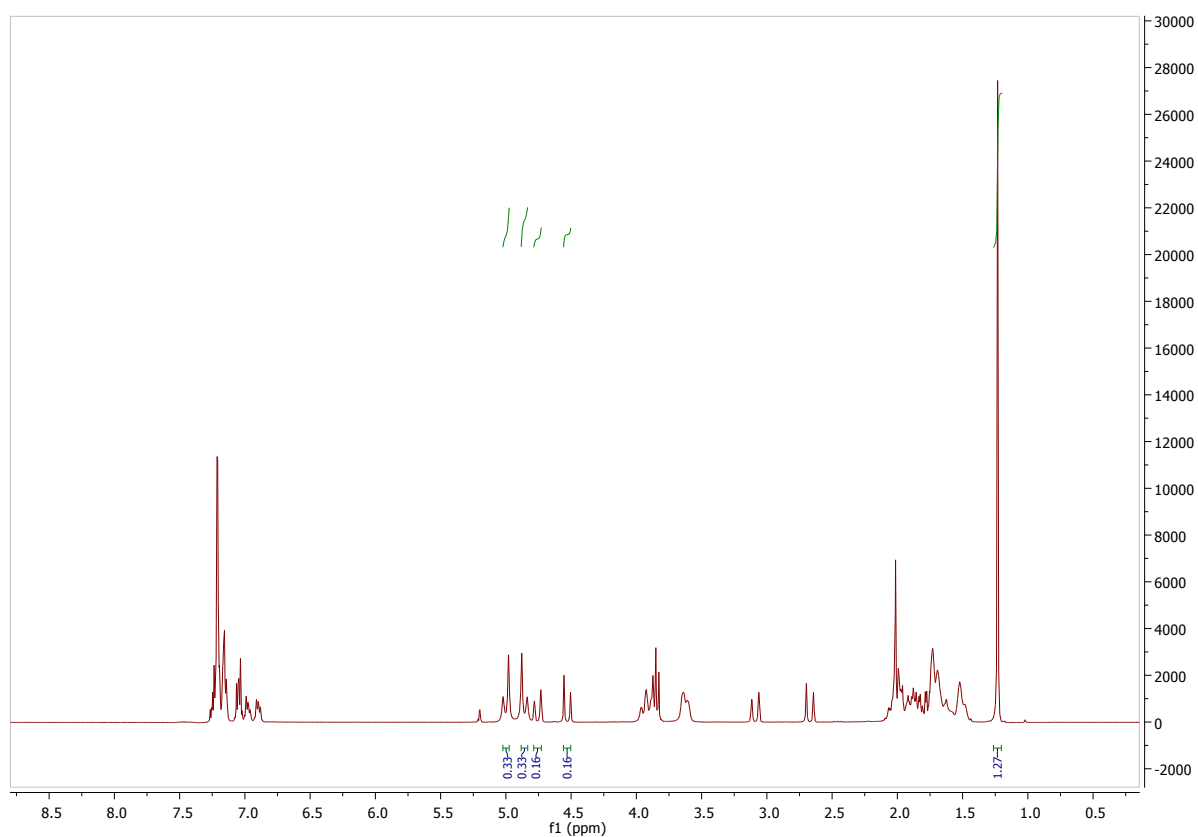

**8.2 Catalyst: 2. Catalyst loading: 0,0001 mol%.**

**Time: 0 h, Conversion 0%**

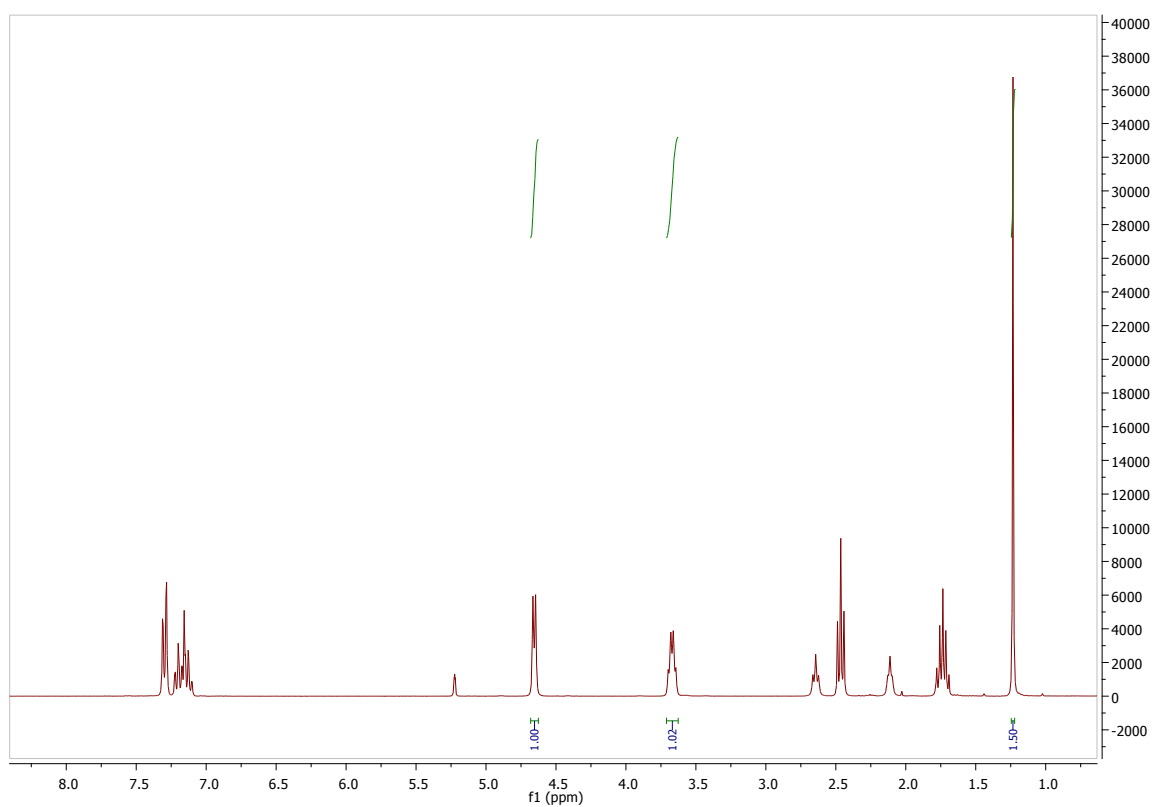

**Time: 6 h, Conversion 10%**

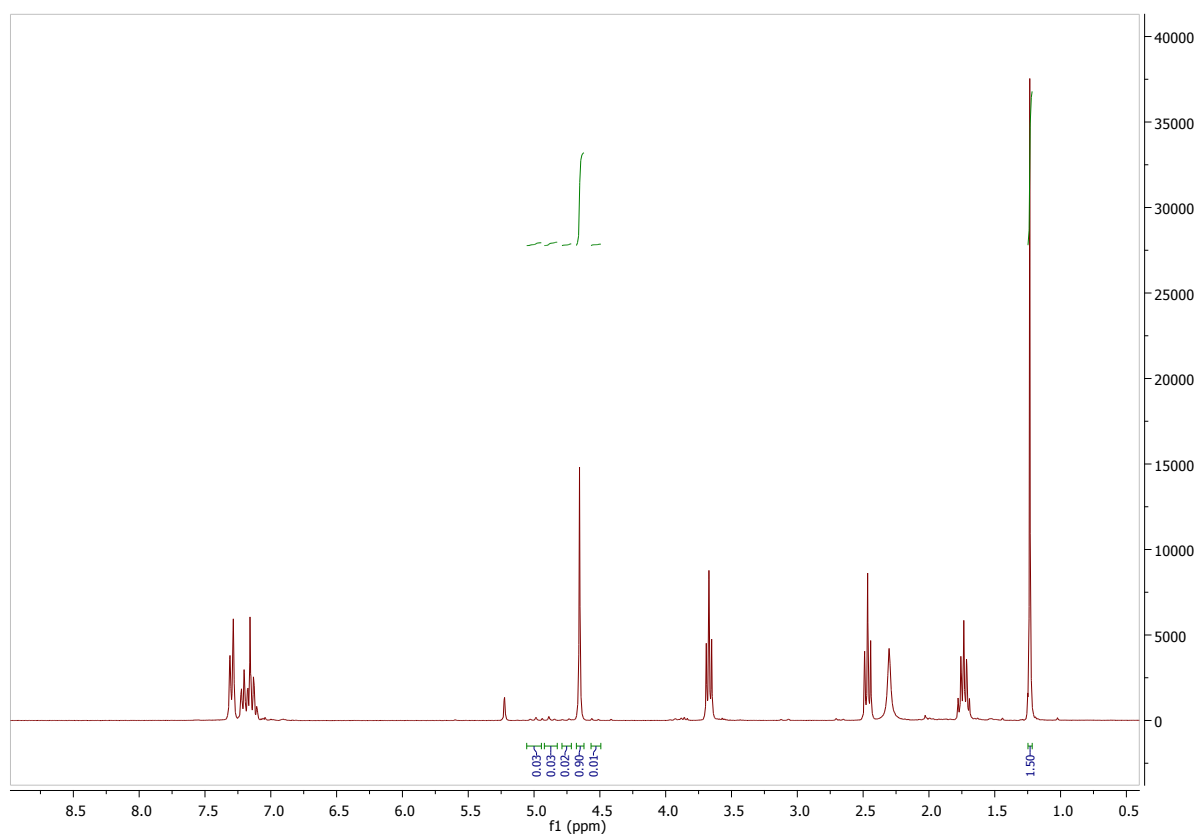

**Time: 25 h, Conversion 72%**

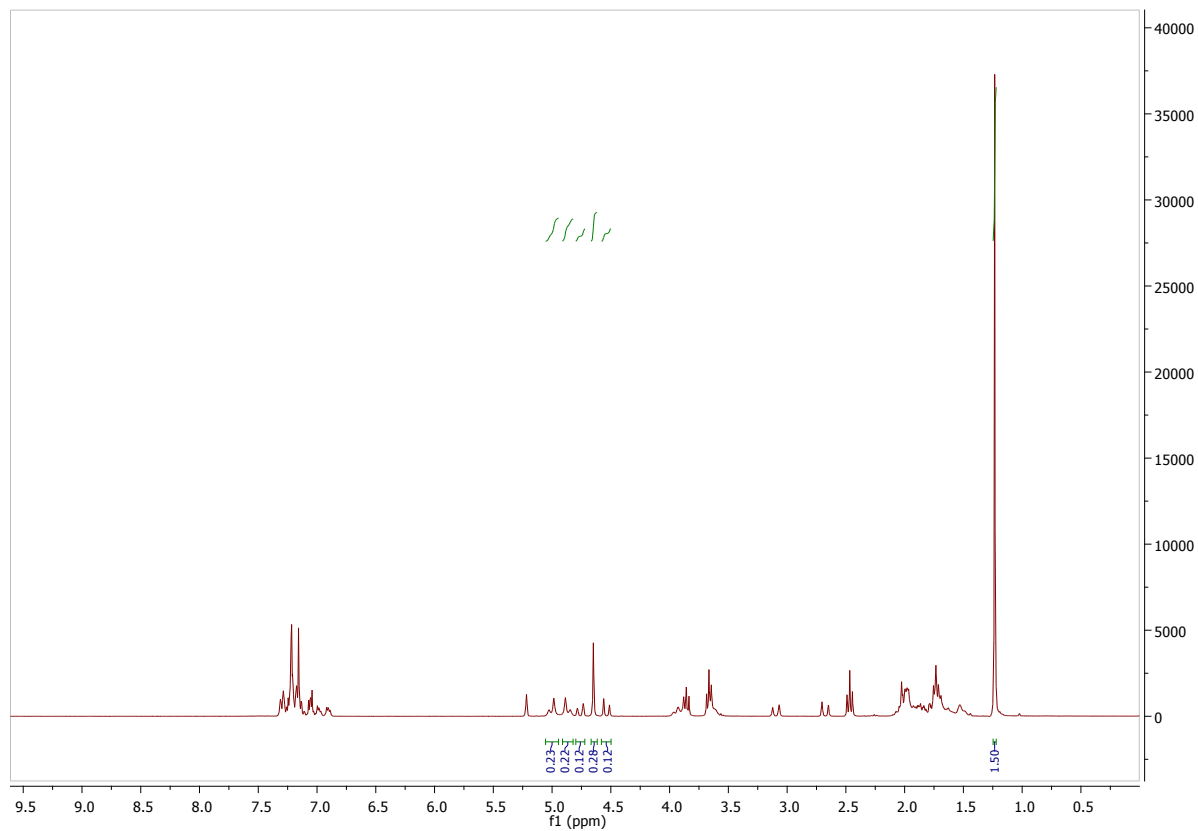



**Time: 40 h, Conversion 100%**

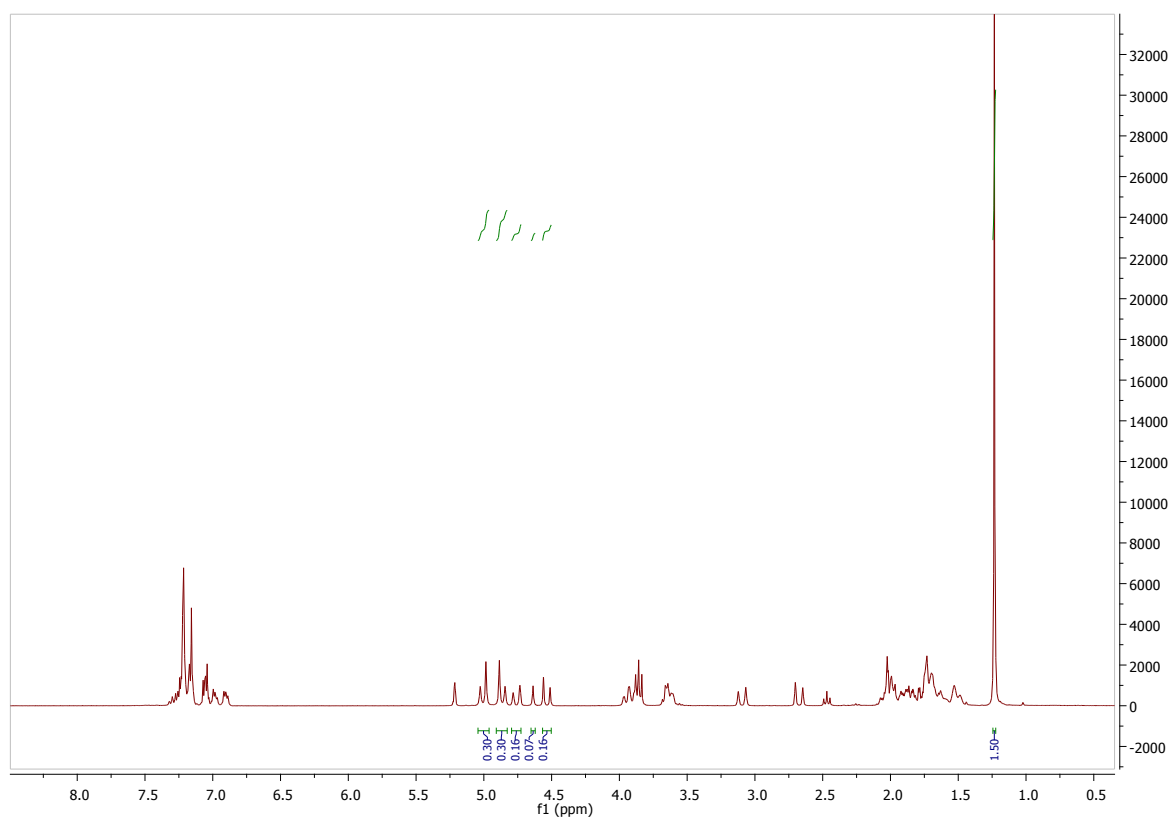

**8.3 Catalyst: 3. Catalyst loading: 0,0001 mol%.**

**Time: 0 h, Conversion 0%**

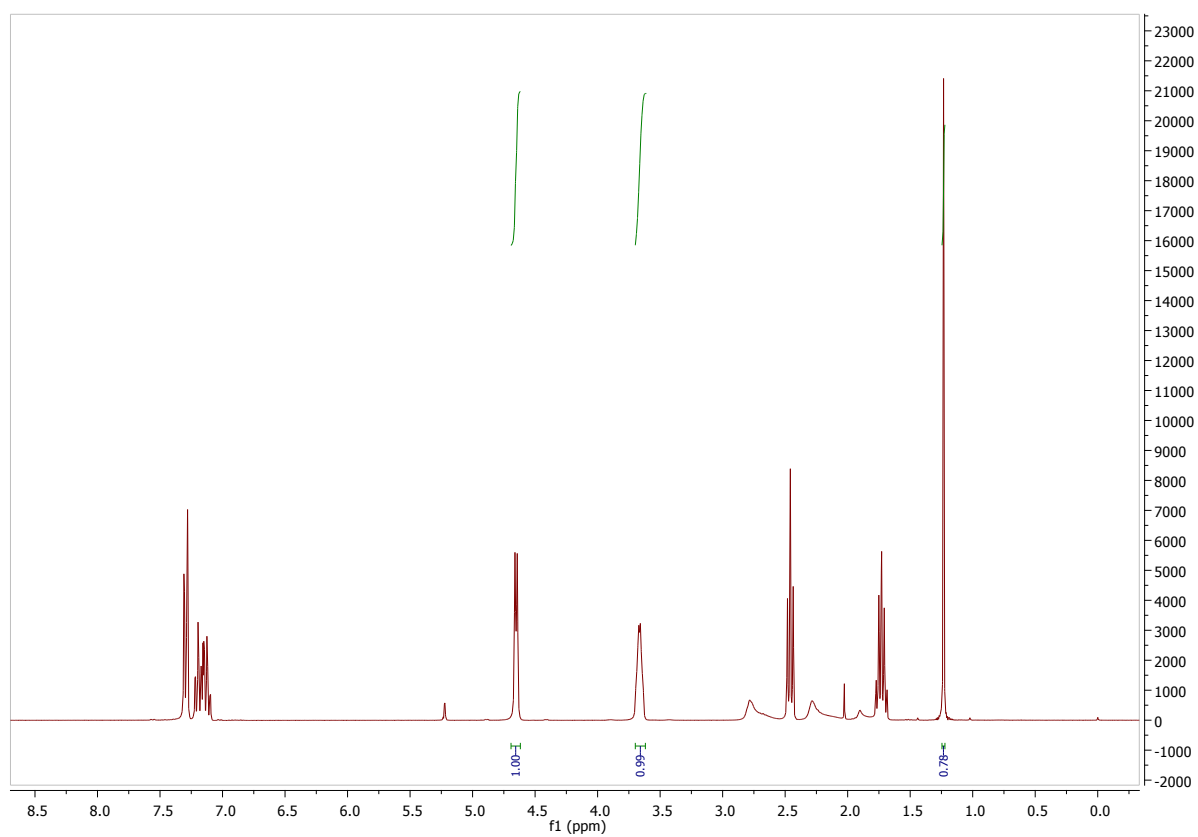

**Time: 6 h, Conversion 9%**

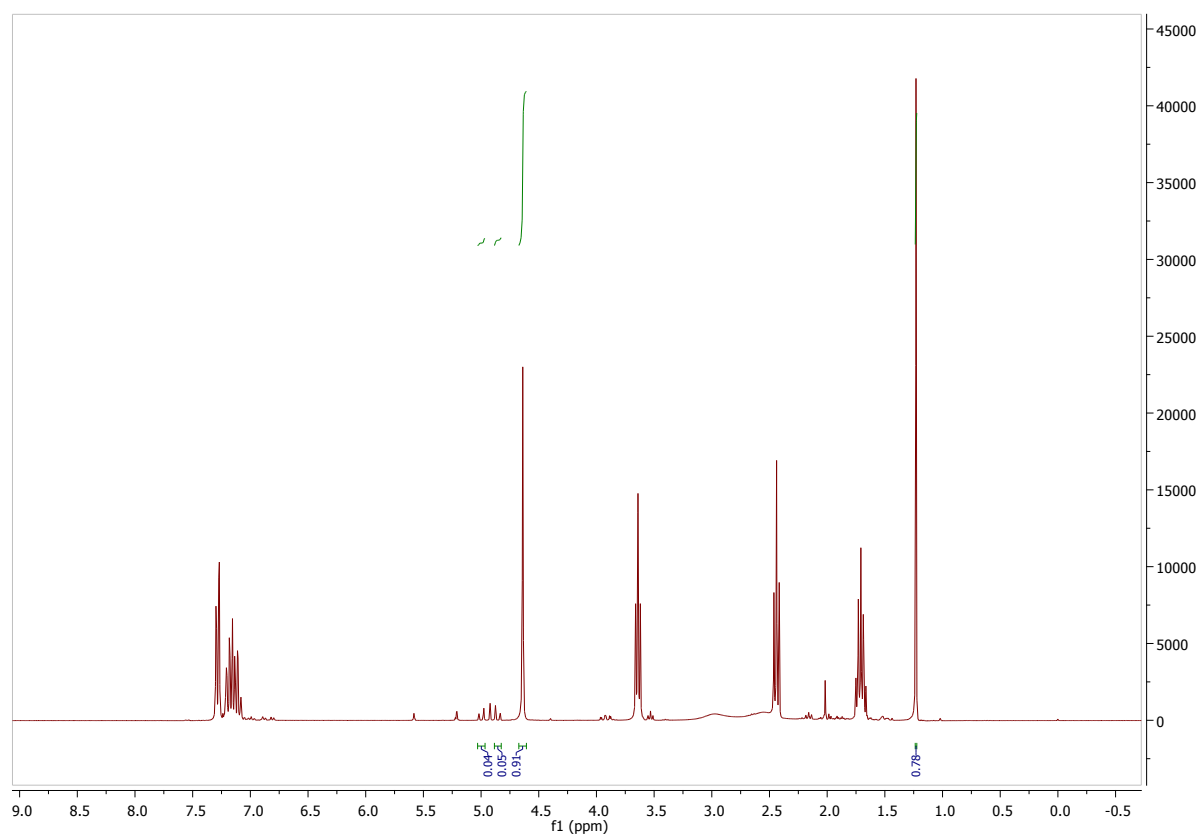

**Time: 20 h, Conversion 44%**

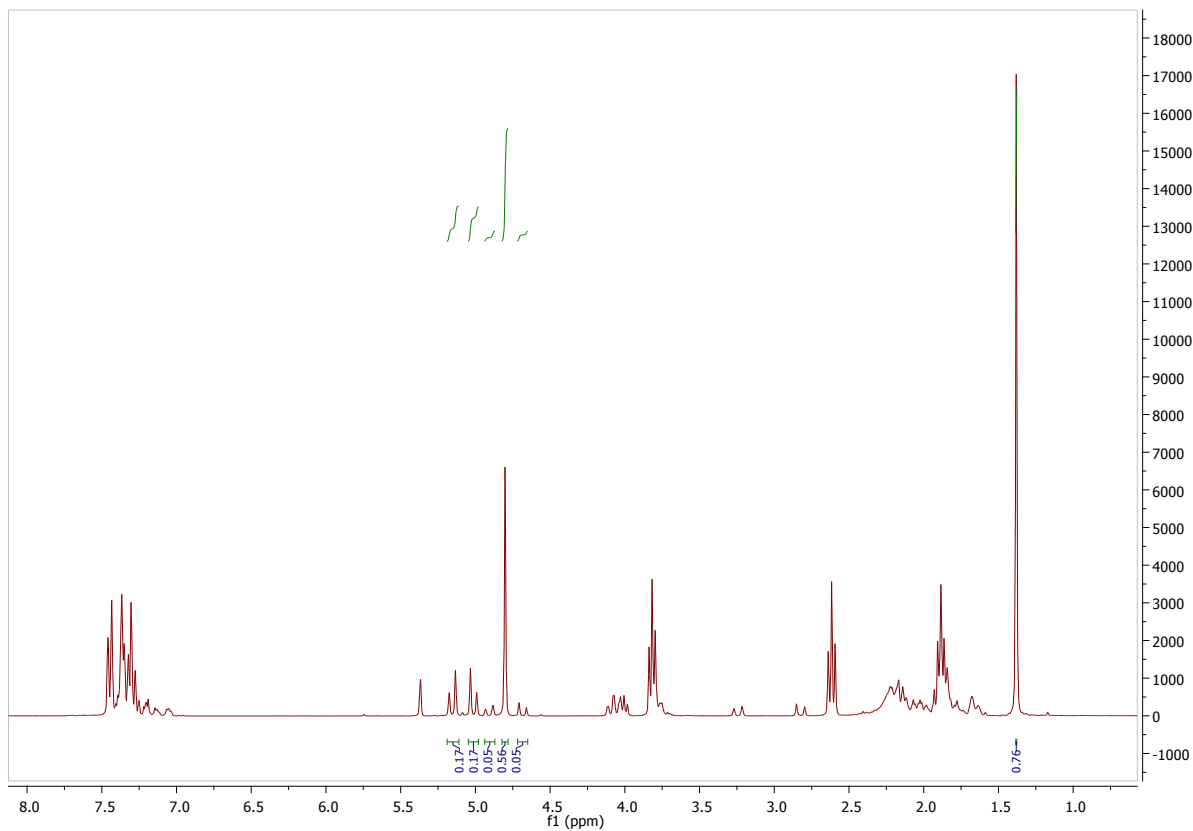

**Time: 40 h, Conversion 97%**

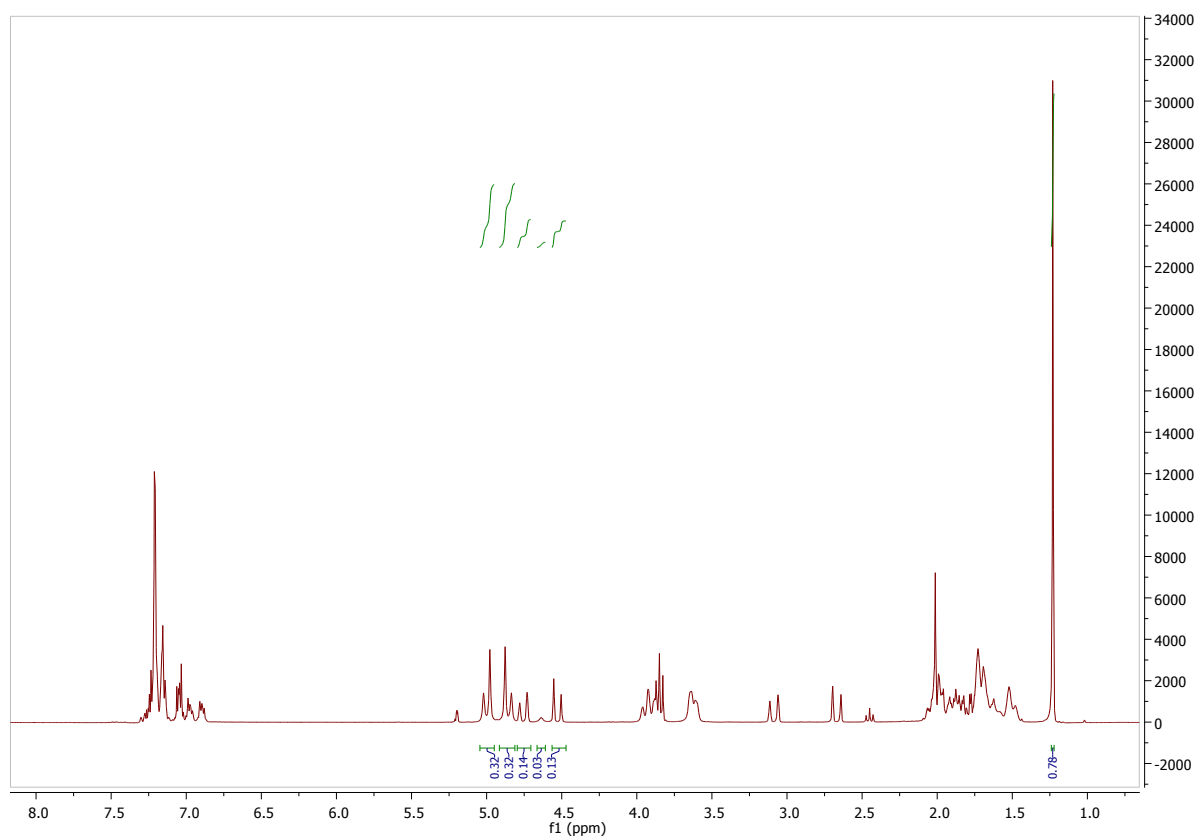

### 9. Comparison of the Conversion of Substrate 9 using Catalyst 1-3 at 0.0001 mol% Catalyst Loading

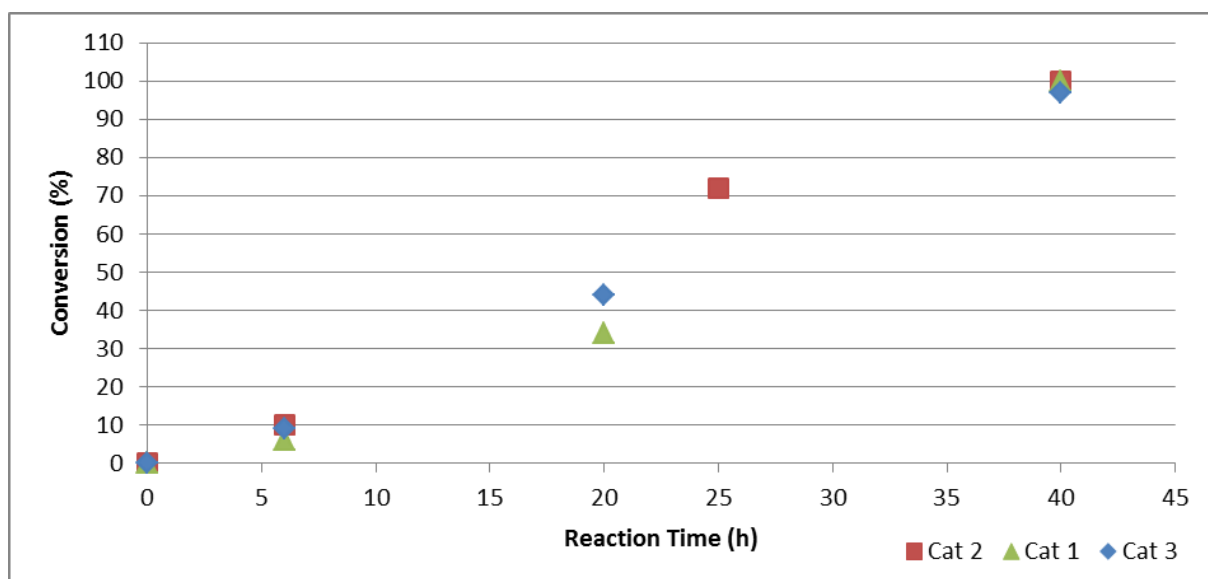

**10. Comparison of the Conversion of Substrate 9 using the NAC catalyst and catalysts 1-3 at 0.0001 mol% Catalyst Loading**

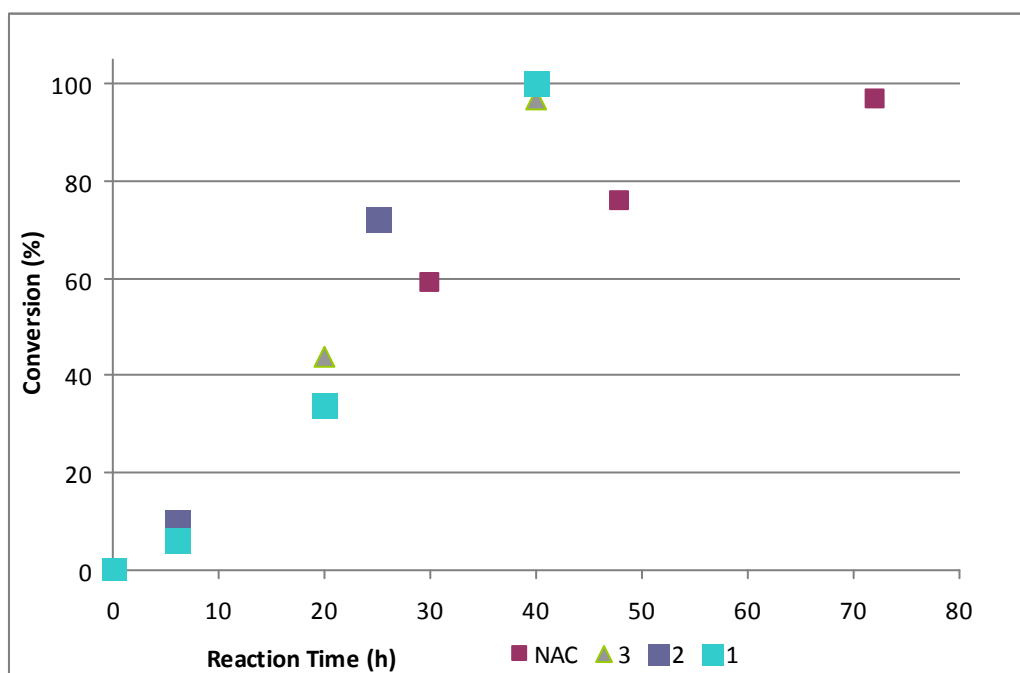

**References:**

1. S. E. Gibson, C. Johnstone, A. Stevenazzi, *Tetrahedron* 2002, **58**, 4937.
2. S. Carrettin, M.C. Blanco, A. Corma, A. S. K. Hashmi, *Adv. Synth. Catal.* 2006, **348**, 1283.
3. Messerle, B. and Vuong K. Q., *Organometallics* 2007, **26**, 3031.
